# Supplementary material for: Hypoxia shifts activity of neuropeptide Y in Ewing sarcoma from growth-inhibitory to growth-promoting effects
Source: PubMed Central journal article supplement (PMC3926843; doi:10.18632/oncotarget.1604), 2013-11-26
Supplement: oncotarget-04-2487-s002.pdf [file oncotarget-04-2487-s002.pdf]

**Hypoxia shifts activity of neuropeptide Y in Ewing sarcoma from growth-inhibitory to growth-promoting effects – Tilan et al**

Supplementary table 1: Comparison of clinical features and tumor characteristics in ES patients with low and high percent of Y2R-positive tumor cells.

|                                                           | <b>Y2R low</b><br>(0-10% of Y2R+ tumor cells)<br>n=6 | <b>Y2R high</b><br>(40-100% of Y2R+ tumor cells)<br>n=10 |
|-----------------------------------------------------------|------------------------------------------------------|----------------------------------------------------------|
| <b>Gender</b>                                             |                                                      |                                                          |
| Male                                                      | 2 (33%)                                              | 5 (50%)                                                  |
| Female                                                    | 4 (67%)                                              | 5 (50%)                                                  |
| <b>Age at diagnosis (years)</b>                           |                                                      |                                                          |
| Median                                                    | 10.5                                                 | 13                                                       |
| Range                                                     | 7-31                                                 | 2-38                                                     |
| <b>Tumor localization</b>                                 |                                                      |                                                          |
| Bone                                                      | 5 (83%)                                              | 6 (60%)                                                  |
| Soft tissue                                               | 1 (17%)                                              | 4 (40%)                                                  |
| <b>Stage at diagnosis</b>                                 |                                                      |                                                          |
| Localized                                                 | 5 (83%)                                              | 8 (80%)                                                  |
| Metastatic                                                | 1 (17%)                                              | 2 (20%)                                                  |
| <b>Blood lakes</b>                                        |                                                      |                                                          |
| Present                                                   | 5 (83%)                                              | 10 (100%)                                                |
| Not present                                               | 1 (17%)                                              | 0 (0%)                                                   |
| <b>Average % of Y2R positive cells around blood lakes</b> | 13%                                                  | 70%                                                      |
| <b>Percent survival at 23 months</b>                      | 100%*                                                | 50% <b>p=0.09</b>                                        |

\* Survival data available for 4 out of 6 patients
